# Supplementary material for: Photocatalytic Hydrogen Production by the Sensitization of Sn(IV)-Porphyrin Embedded in a Nafion Matrix Coated on TiO2
Source: MDPI journal article supplement (doi:10.3390/molecules27123770), 2022-06-11
Supplement: s1 [file s1]

## Supplementary Materials

# Photocatalytic Hydrogen Production by the Sensitization of Sn(IV)-Porphyrin Embedded in a Nafion Matrix Coated on TiO<sub>2</sub>

Sung Hyun Kim and Hee-Joon Kim \*

Department of Chemistry and Bioscience, Kumoh National Institute of Technology, Gumi 39177, Korea; kashik@naver.com

\* Correspondence: hjk@kumoh.ac.kr; Tel.: +82-54-478-7822

### List of contents:

**Figure S1.** Micrographs for platinized TiO<sub>2</sub> (**1**) showing (a) TEM image, (b) EDS spectrum, and (c) elemental mapping images by STEM for platinum (left, red), titanium (center, green) and oxygen (right, blue).

**Figure S2.** Micrographs for Nafion-coated Pt-TiO<sub>2</sub> (**2**) showing (a) TEM image, and (b) EDS spectrum.

**Figure S3.** FT-IR spectra of platinized TiO<sub>2</sub> (**1**) and Nafion-coated Pt-TiO<sub>2</sub> (**2**).

**Figure S4.** Micrographs for SnP<sup>6+</sup>-embedded Nafion/Pt-TiO<sub>2</sub> (**3**) showing (a) TEM image, and (b) EDS spectrum.

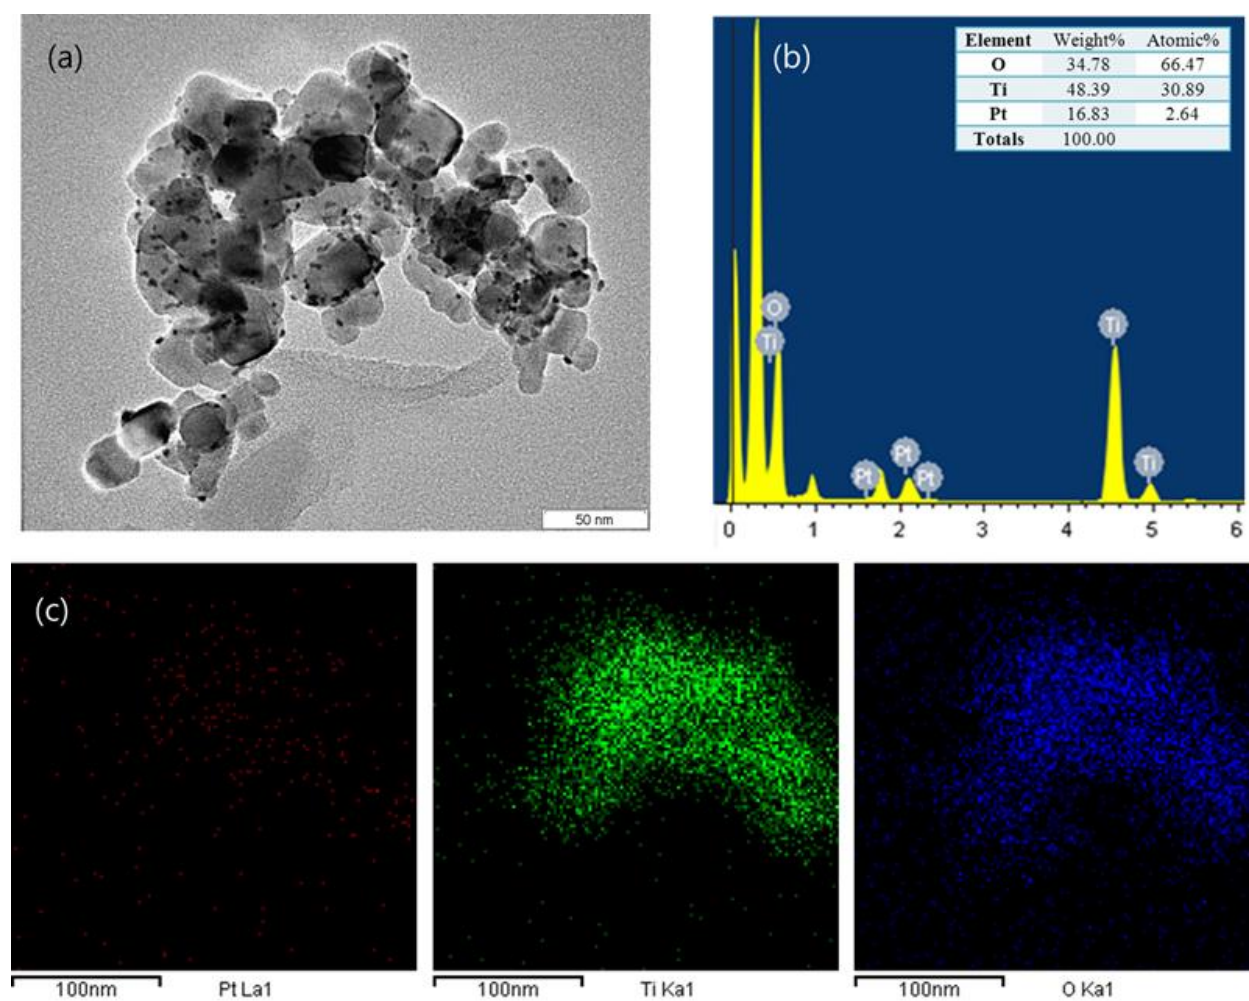

**Figure S1.** Micrographs for platinumized  $\text{TiO}_2$  (**1**) showing (a) TEM image, (b) EDS spectrum, and (c) elemental mapping images by STEM for platinum (left, red), titanium (center, green) and oxygen (right, blue).

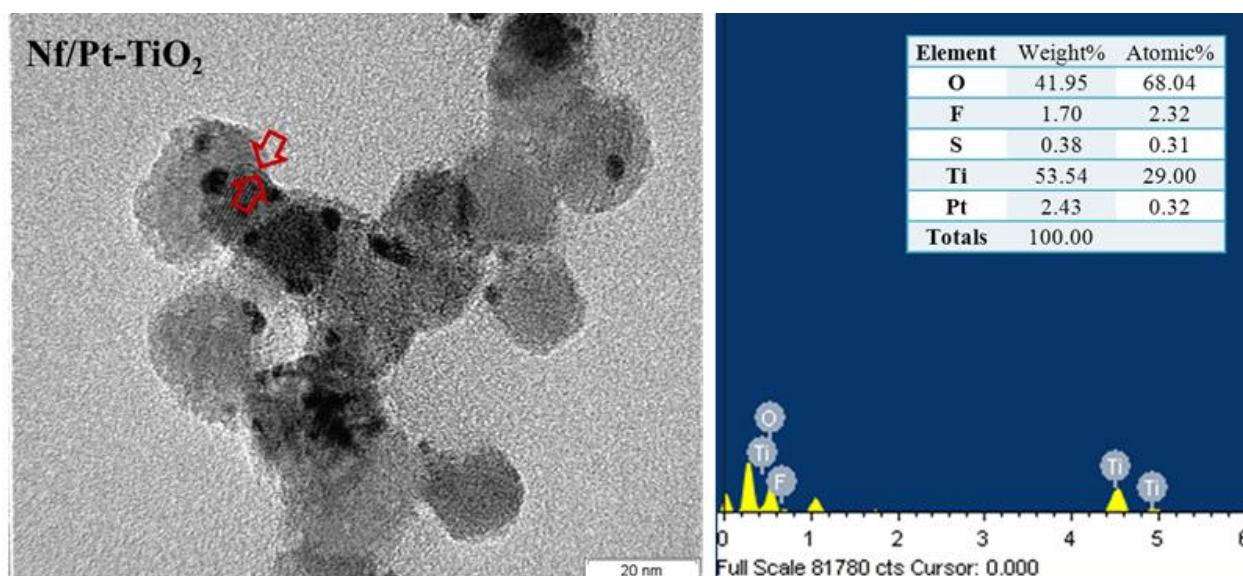

**Figure S2.** Micrographs for Nafion-coated Pt-TiO<sub>2</sub> (2) showing (a) TEM image, and (b) EDS spectrum.

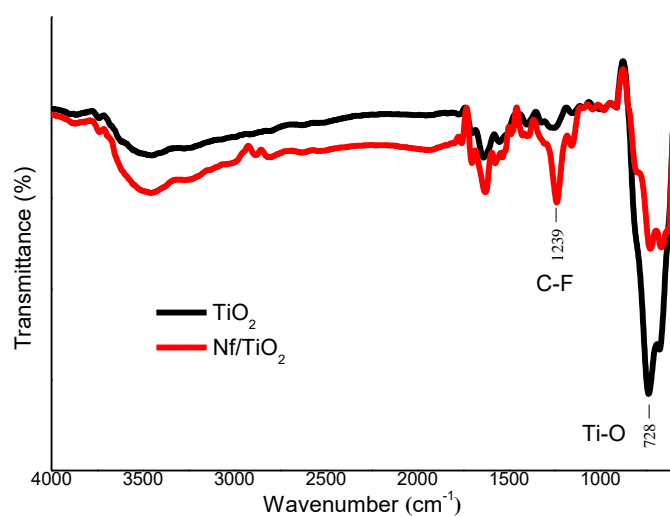

**Figure S3.** FT-IR spectra of platinized TiO<sub>2</sub> (1) and Nafion-coated Pt-TiO<sub>2</sub> (2).

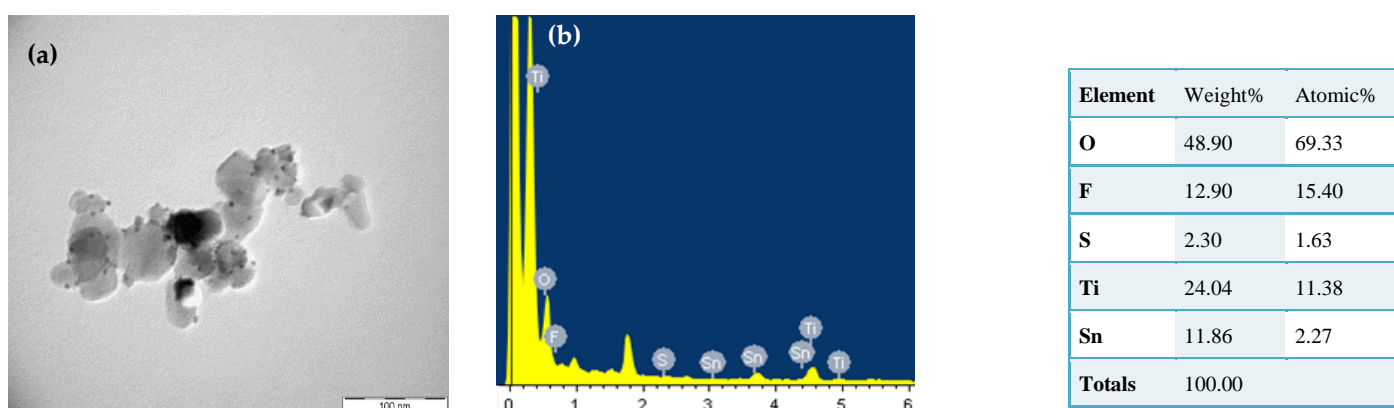

**Figure S4.** Micrographs for  $\text{SnP}^{6+}$ -embedded Nafion/Pt- $\text{TiO}_2$  (3) showing (a) TEM image, and (b) EDS spectrum.
